# Supplementary material for: Utilisation willingness for institutional care by the elderly: a comparative study of empty nesters and non-empty nesters in Shandong, China
Source: PubMed Central journal article supplement — BMJ Open. 2018 Aug 17;8(8):e022324. doi: 10.1136/bmjopen-2018-022324 (PMC6104795; doi:10.1136/bmjopen-2018-022324), 2018-08-17
Supplement: bmjopen-2018-022324supp001.pdf [file bmjopen-2018-022324supp001.pdf]

Appendix Table 1: Variables and assignments

| <b>Variables</b>                   | <b>Code</b> |
|------------------------------------|-------------|
| <b>Gender</b>                      |             |
| Male                               | 0           |
| Female                             | 1           |
| <b>Age</b>                         |             |
| 60-                                | 1           |
| 70-                                | 2           |
| 80-                                | 3           |
| <b>Education</b>                   |             |
| Illiteracy or semiliterate         | 1           |
| Primary school                     | 2           |
| Junior school or above             | 3           |
| <b>Past occupation</b>             |             |
| Farmer                             | 1           |
| Others                             | 2           |
| <b>Marital Status</b>              |             |
| Single <sup>a</sup>                | 1           |
| Couple                             | 2           |
| <b>Number of children</b>          |             |
| 0-3                                | 1           |
| >3                                 | 2           |
| <b>Relationship with children</b>  |             |
| Good or normal                     | 1           |
| Poor                               | 2           |
| <b>Residence</b>                   |             |
| Urban                              | 1           |
| Rural                              | 2           |
| <b>Self-reported health status</b> |             |
| Good                               | 1           |
| Normal                             | 2           |
| <b>Psychological stress</b>        |             |
|                                    | -           |
| <b>ADL</b>                         |             |
| I                                  | 1           |
| II                                 | 2           |
| III                                | 3           |
| <b>NCD</b>                         |             |
| Yes                                | 1           |
| No                                 | 2           |
| <b>Household income</b>            |             |
| Q1 <sup>b</sup>                    | 1           |
| Q2                                 | 2           |
| Q3                                 | 3           |
| Q4                                 | 4           |
